1 **Successful exome capture and sequencing in lemurs using human baits.**

2

3 Timothy H. Webster<sup>1\*</sup>, Elaine E. Guevara<sup>2,3</sup>, Richard R. Lawler<sup>4</sup>, Brenda J. Bradley<sup>2</sup>

4 <sup>1</sup>School of Life Sciences, Arizona State University, Tempe, AZ 85287

5 <sup>2</sup>Center for the Advanced Study of Human Paleobiology, The George Washington  
6 University, Washington, DC 20052

7 <sup>3</sup>Department of Anthropology, Yale University, New Haven, CT 06511

8 <sup>4</sup>Department of Sociology and Anthropology, James Madison University, Harrisonburg,  
9 VA 22807

10

11 Figures: 4

12 Tables: 1

13 Abbreviated title: Exome capture in strepsirrhines

14

15 \*Correspondence to:

16 Timothy H. Webster

17 Arizona State University

18 School of Life Sciences

19 P.O. Box 874501

20 Tempe, AZ 85287

21 Email: [timothy.h.webster@gmail.com](mailto:timothy.h.webster@gmail.com)

22

23 Grant sponsorship: This work was funded by Yale University, The George Washington  
24 University, the Nacey Maggioncalda Foundation, the Wenner-Gren Foundation, the  
25 National Science Foundation (NSF BCS-1455818), the Yale MacMillan Center, and the  
26 Yale Institute for Biospheric Studies.

27  
28  
29  
30  
31  
32  
33  
34  
35  
36  
37  
38  
39  
40  
41  
42  
43  
44  
45  
46  
47  
48  
49

## ABSTRACT

### Objectives

We assessed the efficacy of exome capture in lemurs using commercially available human baits.

### Materials and Methods

We used two human kits (Nimblegen SeqCap EZ Exome Probes v2.0; IDT xGen Exome Research Panel v1.0) to capture and sequence the exomes of wild Verreaux's sifakas (*Propithecus verreauxi*, n = 8), a lemur species distantly related to humans. For comparison, we also captured exomes of a primate species more closely related to humans (*Macaca mulatta*, n= 4). We mapped reads to both the human reference assembly and the most closely related reference for each species before calling variants. We used measures of mapping quality and read coverage to compare capture success.

### Results

We observed high and comparable mapping qualities for both species when mapped to their respective nearest-relative reference genomes. When investigating breadth of coverage, we found greater capture success in macaques than sifakas using both nearest-relative and human assemblies. Exome capture in sifakas was still highly successful with more than 90% of annotated coding sequence in the sifaka reference genome captured, and 80% sequenced to a depth greater than 7x using Nimblegen baits. However, this success depended on probe design: the use of IDT probes resulted in substantially less callable sequence at low-to-moderate depths.

### Discussion

50 Overall, we demonstrate successful exome capture in lemurs using human baits,  
51 though success differed between kits tested. These results indicate that exome capture  
52 is an effective and economical genomic method of broad utility to evolutionary  
53 primatologists working across the entire primate order.

54 **KEY WORDS:** genomics, strepsirrhines, primates, macaques, methods

55

## Introduction

56           Recent advances in next generation sequencing technology and the increasing  
57 availability of annotated reference genomes have made feasible the genomic study of  
58 nonmodel taxa (Ellegren, 2014; Goodwin, McPherson, & McCombie, 2016). Nonhuman  
59 catarrhines, in particular papionin monkeys (Bergey, Phillips-Conroy, Disotell, & Jolly,  
60 2016; Gibbs et al., 2007; Lea, Altmann, Alberts, & Tung, 2016; Wall et al., 2016) and  
61 apes (Carbone et al., 2014; de Manuel et al., 2016; Locke et al., 2011; Perry et al.,  
62 2008; Prado-Martinez et al., 2013), have been the focus of intense genomic study  
63 because of their importance in understanding human evolutionary history (Jolly, 2001;  
64 Swedell & Plummer, 2012; Wrangham, 1987) and history of use as biomedical models  
65 (Carlsson, Schapiro, Farah, & Hau, 2004; Rogers & Gibbs, 2014; Varki, 2000).  
66 However, genomic data hold promise to enable vast insights into evolution, ecology,  
67 and behavior, as well as inform conservation management across the entire primate  
68 order.

69           Nevertheless, genomic analyses remain out-of-reach for many species. Even for  
70 species for which there is a draft genome available, population-scale whole genome  
71 sequencing and the concomitant data storage, management, and analyses often require  
72 prohibitively vast financial, computational, and bioinformatics resources. These  
73 conditions have fostered the development and wide adoption of reduced representation  
74 genomic sequencing methods, like restriction-associated DNA sequencing (RAD-seq;  
75 K. R. Andrews, Good, Miller, Luikart, & Hohenlohe, 2016; Baird et al., 2008). While  
76 RAD-seq and similar “genotyping-by-sequencing” methods have enabled the genomic  
77 study of a variety of nonmodel organisms, aspects of the data—particularly marker

78 sparseness and discontinuity—can be limiting for some research questions (Arnold,  
79 Corbett-Detig, Hartl, & Bomblies, 2013; Lowry et al., 2017; Rubin, Ree, & Moreau,  
80 2012).

81 In contrast, targeted capture involves the selective enrichment of genomic  
82 regions before sequencing, allowing both for more continuous sequence and for control  
83 over the density and identity of targets (Gnirke et al., 2009; Jones & Good, 2016).  
84 Foremost among targeted capture techniques is exome capture and sequencing  
85 (exome sequencing), which primarily targets all the protein coding regions of the  
86 genome along with a number of untranslated regions, promoter regions, and miRNAs  
87 (Clark et al., 2011). In total, these targets account for less than 2% of the genome,  
88 making exome sequencing much more cost-effective than whole genome sequencing,  
89 while still providing the majority of data often desired by those undertaking high  
90 throughput sequencing. Numerous commercial exome capture kits based on the human  
91 genome have been developed and widely adopted in clinical settings and for identifying  
92 the underlying basis of human genetic disorders (Bamshad et al., 2011; Bilgüvar et al.,  
93 2010; Ng et al., 2010).

94 Synthesizing custom high-quality oligonucleotide baits for targeted capture is  
95 expensive and generally requires a high-quality reference genome (Jones & Good,  
96 2016; but see Snyder-Mackler et al., 2016). Because of the close evolutionary, and thus  
97 genetic, relationship between human and nonhuman primates, researchers studying  
98 nonhuman primates are advantageously situated to potentially exploit the baits and  
99 resources developed for human exome sequencing. In particular, human exome baits  
100 have been successfully used in haplorrhine primates (Bataillon et al., 2015; George et

101 al., 2011; Hvilson et al., 2012; Jin et al., 2012; Teixeira et al., 2015; Vallender, 2011).  
102 However, it is currently unclear how well human exome baits would work for more  
103 distantly related species (e.g., strepsirrhine primates).

104 To ascertain and quantify the utility of exome sequencing across the order  
105 Primates, we performed exome capture and sequencing of a distantly related  
106 strepsirrhine species, Verreaux's sifaka (*Propithecus verreauxi*), that diverged from  
107 humans over 60 million years ago (dos Reis et al., 2018). As a direct comparison to  
108 provide context for assessing the strepsirrhine results we also included rhesus  
109 macaques (*Macaca mulatta*), a catarrhine species for which the efficacy of exome  
110 capture using baits designed for humans has already been established (George et al.,  
111 2011; Vallender, 2011). Both species have closely-related reference genomes available  
112 (*P. coquereli*, *M. mulatta*). Our overall goal is to assess capture efficiency, mapping  
113 success, and variant calling using two commercially available human exome capture  
114 kits.

115

## 116 MATERIALS AND METHODS

### 117 *Samples*

118 We collected the Verreaux's sifaka samples from individuals living at Bezà  
119 Mahafaly Special Reserve (Bezà), located in southwestern Madagascar (Toliara  
120 province). As part of long-term research, research team members capture unmarked  
121 yearlings and recent immigrants annually to collect biometric data and give each  
122 individual a unique identifying collar and ear notch pattern (Richard, Dewar, Schwartz, &  
123 Ratsirarson, 2002).

124 For this study, we generated two different Verreaux's sifaka datasets (Sifaka1  
125 and Sifaka2). Sifaka1 is the primary dataset we use throughout the study in comparison  
126 with the macaque samples (Macaque1). We generated the Sifaka2 dataset using  
127 different exome capture kit to explore any effects of bait design on capture success  
128 (described below). For Sifaka1, we extracted DNA from banked ear tissue biopsies as  
129 described in Lawler et al. (2001) from four sifakas: a mother-daughter pair and two  
130 unrelated males (Supporting Information Table S1). For Sifaka2, we extracted DNA  
131 from the ear tissue of two additional male and two additional female sifakas using the  
132 QIAGEN DNeasy Blood and Tissue (Qiagen) kit following manufacturer instructions with  
133 an extended lysis step (Supporting Information Table S1).

134 For a catarrhine comparison, we used DNA derived from blood samples from  
135 four unrelated—two male and two female—captive Indian rhesus macaques  
136 (Macaque1) from the Wisconsin National Primate Research Center (Supporting  
137 Information Table S1).

138

### 139 *DNA extraction, library preparation, and sequencing*

140 We sent extracted DNA to the Yale Center for Genome Analysis (YCGA) for  
141 exome capture, library preparation, and multiplexed sequencing following their standard  
142 protocols, described as follows. For all three datasets (Sifaka1, Sifaka2, and  
143 Macaque1), genomic DNA was sheared to a mean fragment length of 140 bp and  
144 adapters were ligated onto both ends of fragments. Fragments were then PCR  
145 amplified, during which a 6 bp barcode was inserted at one end of each fragment.  
146 Libraries were hybridized with baits from two different kits: Nimblegen baits (Nimblegen

147 SeqCap EZ Exome version 2) were used for Sifaka1 and Macaque1, and IDT xGen  
148 baits (IDT xGen Exome Research Panel 1.0) were used for Sifaka2. Fragments were  
149 then mixed with streptavidin-coated beads and washed to remove unbound fragments.  
150 Captured fragments were then PCR amplified and purified with AMPure XP beads.  
151 Libraries from Sifaka1 and Macaque1 were multiplexed (all four sifaka samples in one  
152 lane, and the four macaques in another lane with two other samples) and sequenced  
153 using 75 bp paired-end reads on a single lane of an Illumina HiSeq 2000 using Illumina  
154 protocols. Sifaka2 libraries were sequenced using 100 bp paired-end reads on a single  
155 Illumina HiSeq 4000 lane and multiplexed with eight other samples (12 total samples  
156 per lane, but only four are included in this study).

157

#### 158 *Exome assembly*

159 We assessed read quality pre- and post-trimming using FastQC (S. Andrews,  
160 2018) and MultiQC (Ewels, Magnusson, Lundin, & Källner, 2016). We used BBDuk  
161 (Bushnell, 2018) to remove adapters and perform quality trimming using the parameters  
162 “ktrim=r k=21 minq=11 hdist=2 tbo tpe qtrim=rl trimq=10”. We then mapped reads from  
163 sifaka samples (Sifaka1 and Sifaka2) to the *Propithecus coquereli* draft genome  
164 (Pcoq\_1.0; Baylor College of Medicine; <https://www.ncbi.nlm.nih.gov/genome/24390>).  
165 *P. verreauxi* and *P. coquereli* share a common ancestor 3-8 million years ago (Herrera  
166 & Dávalos, 2016; Springer et al., 2012). We mapped macaque samples (Macaque1) to  
167 the Indian rhesus macaque draft genome (Mmul\_8.0.1; *Macaca mulatta* Genome  
168 Sequencing Consortium;  
169 [https://www.ncbi.nlm.nih.gov/genome/215?genome\\_assembly\\_id=259055](https://www.ncbi.nlm.nih.gov/genome/215?genome_assembly_id=259055)). Finally, we



170 mapped reads from both species to the human reference genome (hg38; Genome  
171 Reference Consortium, Dec 2013). For the rest of the manuscript, we refer to  
172 Mmul\_8.0.1 as mmul8, proCoq\_1.0 as pcoq1, and hg38 as hg38. In all cases, we  
173 mapped reads using BWA MEM (Li, 2013) using default parameters except for “-t 4”  
174 and “-R” to add read group information. We marked duplicates with SAMBLASTER  
175 (Faust & Hall, 2014). We then used SAMtools (Li et al., 2009) to fix read pairing, and  
176 sort and index BAM files.

177       To enable a direct comparison of exome capture success between species for  
178 which we had different numbers of raw reads and different duplication rates, we  
179 conducted all downstream analyses on downsampled BAM files (containing the same  
180 number of reads for each individual). To downsample BAM files, we first used the “stats”  
181 tool in SAMtools (Li et al., 2009) to count the total number of reads and number of  
182 duplicate reads in each BAM file. We then used the “view” tool in SAMtools (Li et al.,  
183 2009) with the parameters “-F 1024 -s 0.<subsample\_fraction>” to subsample  
184 approximately 50 million reads, where <subsample\_fraction> is equal to 50 million  
185 divided by the total number of nonduplicate reads. The flag “-F 1024” removes reads  
186 flagged as duplicate.

187

### 188 *Variant calling*

189       We jointly called variants for each dataset using both GATK’s HaplotypeCaller  
190 (Poplin et al., 2018) and Freebayes (Garrison & Marth, 2012). To speed up processing,  
191 we input BED files containing minimally callable sites—depth greater than 3, mapping  
192 quality greater than 19, and base quality greater than 29—generated using CallableLoci

193 in GATK (McKenna et al., 2010). Finally, we filtered variants for site quality (minimum of  
194 30), sample depth (minimum of 8), sample genotype quality (minimum of 30), allele  
195 support (minimum of 3 reads), and number of passing samples (minimum of 4) with a  
196 Python script built using the cyvcf2 library (Pedersen & Quinlan, 2017).

197 We functionally annotated filtered variants using Ensembl's Variant Effect  
198 Predictor (McLaren et al., 2016) tool with annotations derived from the NCBI gene  
199 format files corresponding to the respective reference genomes for the rhesus and  
200 sifaka references (NCBI *Macaca mulatta* Annotation Release 102 [GCF\_000772875.2]  
201 and *Propithecus coquereli* Annotation Release 100 [GCA\_000956105.1]), and  
202 Ensembl's cache for the human reference (hg38). We also obtained NCBI's annotation  
203 for the human reference (GCF\_00001405.37) for use in our coverage analyses (see  
204 below). Using these annotation files, we intersected various regions (exon, intron, and  
205 intergenic) with filtered variants using bedtools "intersect" (Quinlan & Hall, 2010) and  
206 then used the "stats" module of BCFtools (Li, 2011) to tally variants in each region.

207

#### 208 *Coverage analysis*

209 We calculated the mean and standard deviation of mapping quality (MAPQ) of  
210 reads within each BAM file using a custom program written in Go ("*mapqs.go*") using  
211 packages in *bioigo/hts* (Kortschak, Pedersen, & Adelson, 2017). BWA MEM's (Li, 2013)  
212 MAPQ scores are PHRED-scaled and can range from 0-60, with higher values  
213 indicating increased confidence in mapping accuracy.

214 We counted the number of callable sites across a variety of depths and genomic  
215 regions by first using SAMtools (Li et al., 2009) "view" to remove duplicates and reads

216 with a mapping quality less than 20 with the flags “-F 1024 -q 20”, and then calculating  
217 per site depths with *genomecov* in bedtools (Quinlan & Hall, 2010), outputting in  
218 bedgraph format (“-bg”). We then processed bed files, including intersecting with  
219 genomic regions derived from the NCBI annotation described above using bedtools  
220 (Quinlan & Hall, 2010), BEDOPS (Neph et al., 2012), and a custom Python script  
221 (“*Compute\_histogram\_from\_bed.py*”). Finally, we used the *coverage* module in bedtools  
222 with default parameters (Quinlan & Hall, 2010) to calculate the fraction of each coding  
223 region with coverage. Note that for all region-based analyses, we merged regions in the  
224 NCBI GFF annotations during processing because many, but not all, regions were  
225 present multiple times.

226

#### 227 *Exome capture kit comparison*

228 We used the *sifaka* datasets (*Sifaka1* and *Sifaka2*) for a direct comparison of  
229 capture success using the two different capture kits (NimbleGen SeqCap EZ Exome  
230 version 2 for *Sifaka1* and IDT xGen Exome Research Panel 1.0 for *Sifaka2*). We ran  
231 both datasets through identical exome assembly and coverage analysis steps as  
232 described above.

233

#### 234 *Data Availability*

235 We deposited raw sequencing reads in NCBI’s Sequence Read Archive  
236 (<https://www.ncbi.nlm.nih.gov/sra>) under BioProject PRJNA417716. We provide SRA  
237 accession numbers in Supporting Information Table S1.

238 We built all analyses into a reproducible pipeline using Snakemake (Köster &  
239 Rahmann, 2012), Bioconda (Grüning et al., 2018). The entire pipeline—including all  
240 scripts, environment files, and software versions—is available on Github  
241 ([https://github.com/thw17/Sifaka\\_assembly](https://github.com/thw17/Sifaka_assembly)).

242

### 243 *Ethics Statement*

244 We report no conflict of interest. All research conformed to institutional and  
245 national guidelines, and complied with the American Association of Physical  
246 Anthropologists Code of Ethics. This protocol is approved by the James Madison  
247 University Institutional Animal Care and Use Committee (protocol numbers A03-14 and  
248 A18-04) and permission to conduct research at Bezà was granted by the Malagasy  
249 Ministry of the Environment.

250

### 251 **3. Results**

252 We generated the following mean numbers of raw sequencing reads per sample:  
253 96,358,883 for Sifaka1 (range 80,434,390–108,538,766), 65,460,924 for Macaque1  
254 (range 59,422,700–70,596,638), and 75,441,014 for Sifaka2 (range 70,264,610–  
255 79,520,110) (Supporting Information Table S2). After trimming, duplicate removal, and  
256 quality control, 83-86% of Sifaka1 reads, 89-92% of Macaque1 reads, and 68-70% of  
257 Sifaka2 reads passed all filters, with differences among datasets largely driven by  
258 duplication rates (Supporting Information Table S2). To account for these differences in  
259 duplication rates and raw sequences generated, we downsampled reads for all samples

260 to approximately 50 million nonduplicate reads (Supporting Information Table S2). We  
261 only included the downsampled datasets in downstream analyses.

262 Mapping qualities were very similar when mapping samples to their most closely  
263 related reference genomes (pcoq1 for sifakas; mmul8 for macaques). Across datasets,  
264 we observed mean mapping qualities of approximately 56 (out of a maximum of 60),  
265 with standard deviations ranging between 11 and 14 (Figure 1). However, when  
266 mapping to the human reference genome (hg38), mapping qualities decreased  
267 substantially—dropping to approximately 52 in Macaque1, 45 in Sifaka1, and 48 in  
268 Sifaka2—and the standard deviation increased (Figure 1).

269 We measured the number of sites in coding (CDS), intergenic, intronic, and  
270 untranslated (UTR) regions at four different depth thresholds (1x, 4x, 8x, and 12x),  
271 counting only nonduplicate reads with a minimum mapping quality of 20, which we term  
272 “callable sites.” Across all regions and in both datasets (Sifaka1 and Macaque1), we  
273 observed a decrease in the number of callable sites as we increased minimum depth of  
274 coverage (Figure 2). This decrease was minor for CDS and UTR, while intronic and  
275 intergenic regions exhibited a disproportionate drop moving from 1x to 4x thresholds  
276 (Figure 2). We observed taxon differences as well. Specifically, the Macaque1 samples  
277 exhibited more callable sites in each region than those in Sifaka1 for all reference  
278 genomes. Moreover, we found little difference between callable sites in mmul8 and  
279 hg38 for each region in Macaque1, in contrast to Sifaka1, for which we observed a  
280 decrease in callable sites across regions when moving from pcoq1 to hg38 (Figure 2).

281 Because the primary goal of exome sequencing is to target coding sequence, we  
282 explored CDS in more detail (Figure 3; Figure 4). For both Sifaka1 and Macaque 1,

283 when mapping to the most closely related reference genome (pcoq1 and mmul8,  
284 respectively), we found that more than 90% of annotated CDS had one or more reads  
285 mapped to it (Figure 3; Sifaka1 mean = 90.9%, Macaque1 mean = 92.8%). However, as  
286 the minimum depth threshold increased, we observed a steeper decline in Sifaka1 than  
287 Macaque 1 until approximately 20x coverage. For example, Sifaka1 had means of  
288 84.1% (4x), 78.7% (8x), 74.0% (12x), 69.9% (16x) and 66.1% (20x) of CDS covered at  
289 increasing thresholds, while Macaque1 had broader coverage at each threshold: 89.1%  
290 (4x), 85.1% (8x), 80.7% (12x), 75.8% (16x), and 70.6% (20x) of CDS covered (Figure  
291 3). This pattern was far more pronounced when the two datasets were mapped to hg38.  
292 Across the same depth thresholds, Sifaka1 had approximately 10-14% fewer bases  
293 covered when mapping to pcoq1 to hg38 (Figure 3), while Macaque1 only exhibited a 3-  
294 5% decrease per threshold moving from mmul8 to hg38 (Figure 3).

295 We also tested to see if exome capture success in strepsirrhines was consistent  
296 across two commonly used commercially available human kits: NimbleGen (Sifaka1)  
297 and IDT (Sifaka2). At lower minimum depth thresholds typically used in genomic  
298 analyses (e.g., 8x and 12x), the NimbleGen kit recovered more than 20% more CDS in  
299 pcoq1 and 15% more CDS in hg38 than IDT (Figure 4). This difference was significant  
300 across depths less than 50x ( $U=31378$ ,  $p < 2.2 \times 10^{-16}$ ). Interestingly, because  
301 NimbleGen and IDT exhibit different slopes, they intersect at approximately 50x  
302 coverage (Figure 4). While NimbleGen probes still recover significantly more CDS at  
303 depth thresholds between 50x and 100x ( $U=38416$ ,  $p < 2.2 \times 10^{-16}$ ), the proportion of  
304 bases with  $X$  or more coverage exhibits the opposite pattern in this interval, with IDT

305 displaying higher values (Figure 4). This pattern is consistent with IDT capturing less  
306 sequence, but at greater depths (i.e., depths greater than 100x).

307 To further explore the difference in capture success between NimbleGen and  
308 IDT, we calculated the breadth of coverage across coding regions in pcoq1. NimbleGen  
309 probes captured a significantly greater mean fraction of coding regions, measured as  
310 the mean fraction of each coding sequence covered by at least one read (185,162  
311 regions; NimbleGen mean = 0.91, IDT mean = 0.63;  $U=1.89 \times 10^{11}$ ,  $p < 2.2 \times 10^{-16}$ ).  
312 Upon closer examination, this difference was primarily driven by IDT completely missing  
313 more coding regions. Among 185,162 coding regions in pcoq1, 33.8% of regions lacked  
314 coverage in the IDT data (range 33.6-34%), while only 7.1% completely lacked  
315 coverage in the NimbleGen dataset (range = 6.6-7.3%). When we excluded these  
316 regions with no coverage, the difference in mean fraction of coding regions captured  
317 decreased substantially, though NimbleGen still captured significantly more (NimbleGen  
318 mean = 0.98, IDT mean = 0.95;  $U=1.57 \times 10^{11}$ ,  $p < 2.2 \times 10^{-16}$ ).

319 We used two variant callers, GATK's HaplotypeCaller and Freebayes, to  
320 genotype Sifaka1 and Macaque1 when mapped to hg38 and the closest reference  
321 (pcoq1 for Sifaka1, and mmul8 for Macaque1), for a total of eight sets of variant calls  
322 (Supporting Information Table 3). In both datasets, variant call sets for the most closely  
323 related genome were broadly similar between HaplotypeCaller and Freebayes in terms  
324 of number of variants identified and genes overlapped (Supporting Information Table 3).  
325 However, when mapped to hg38, the datasets showed opposite patterns: for Sifaka1,  
326 HaplotypeCaller identified approximately four times as many variants as Freebayes  
327 (HaplotypeCaller = 250,389, Freebayes = 62,793), while in Macaque1 Freebayes

328 identified more than 56% more variants (HaplotypeCaller = 97,709, Freebayes =  
329 152,768; Supporting Information Table 3).

330 While the number of variants identified across call sets differed substantially,  
331 within call sets, proportions of variant types were broadly similar (Supporting Information  
332 Table 3). Most variants identified across call sets were single nucleotide variants (SNVs;  
333 71.6-81.2%), though proportions of multiple nucleotide variants (MNVs), insertions, and  
334 deletions increased when mapping to hg38. Similarly, the relative numbers of  
335 nonsynonymous, frameshift, and stop gained variants in exons were much higher when  
336 mapping to hg38 (Table 1). Variants were not limited to exons however, as most  
337 variants were intronic (Supporting Information Table 3).

338

#### 339 **4. Discussion**

340 In this study we demonstrate, for the first time, that human baits can be used to  
341 successfully capture high-coverage exomic data for strepsirrhines. While previous  
342 studies have established that human baits are effective in anthropoid primates (George  
343 et al., 2011; Jin et al., 2012; Vallender, 2011), our results extend the cross-species  
344 application of baits to lineages diverged over 60 million years ago (dos Reis et al., 2018)  
345 and indicate that human baits are likely viable options for genomic analyses across the  
346 entire primate order.

347 We found that a mean of 90.9% of annotated coding sequence (CDS) in the draft  
348 *P. coquereli* genome was covered by one or more reads in our *P. verreauxi* samples. As  
349 we increased the minimum depth of coverage thresholds to match common filter values  
350 (e.g., 4x, 8x, and 12x coverage), we observed a steady, curvilinear decline in breadth of



351 CDS coverage (Figure 3). This pattern indicates that coverage is not uniform across  
352 CDS, consistent with predictions for next-generation sequencing (Lander & Waterman,  
353 1988), particularly those for targeted capture (Clark et al., 2011; Sims, Sudbery, Illott,  
354 Heger, & Ponting, 2014). In particular, in targeted sequencing, there are expected  
355 position-based sampling biases that lead to greater coverage towards the middle of  
356 targets (Wendl & Barbazuk, 2005). However, despite the fact that increasing  
357 sequencing effort will increase depth nonuniformly across targets, clearly any CDS base  
358 with coverage has been successfully captured. Therefore, increasing sequencing  
359 effort—we used 50 million nonduplicate reads in this study—should increase the  
360 fraction of callable CDS at various coverage thresholds up to at least 90.9%, the  
361 amount of CDS we observed covered by at least one read in this study.

362 Surprisingly, the fraction of captured CDS in sifakas (90.9%) was very similar to,  
363 albeit slightly smaller than, the fraction captured in rhesus macaques (92.8%), even  
364 though macaques share a much more recent common ancestor with humans (30-35  
365 million years; dos Reis et al., 2018). However, the macaques exhibited a slower  
366 decrease in breadth of CDS coverage at increasing minimum depth thresholds,  
367 particularly across thresholds most commonly used (Figure 3). Thus, while exome  
368 capture is certainly highly successful in sifakas, there is a decrease in efficiency  
369 compared to lineages more closely related to humans. This pattern holds both when  
370 mapping to the nearest reference genomes (pcoq1 for the sifakas and mmul8 for the  
371 macaques) and when mapping back to the human reference, and therefore appears to  
372 be driven by capture success, rather than assembly methods (e.g, mapping).

373           Similar to our results, previous studies have noted a decrease in capture  
374 efficiency across increasing evolutionary distances within catarrhine primates (Jin et al.,  
375 2012; Vallender, 2011). In this study, however, we found that this effect was much less  
376 pronounced even though we sampled much greater evolutionary distances. This is likely  
377 driven by differences in mapping strategies. Previously, assessments of capture  
378 efficiency involved mapping back to the human reference genome (George et al., 2011;  
379 Jin et al., 2012; Vallender, 2011). In this study, we found that mapping across large  
380 evolutionary distances appears to reduce both breadth and depth of coverage (Figure  
381 3), an effect likely caused by the greater number of differences between reads and the  
382 reference sequence, which substantially impacts mapping quality (Figure 1). In fact, the  
383 Indian rhesus macaques used in this study were much more closely related to their  
384 nearest reference (same population and species) than the Verreaux's sifakas (about 6  
385 million years diverged from *P. coquereli*; dos Reis et al., 2018), which might account for  
386 some of the difference in our observed capture success between the two species,  
387 though this requires further study. In addition, while most protein-coding genes in  
388 sifakas and macaques are expected to have homologues in humans, gene content is  
389 not identical across primates (Rogers & Gibbs, 2014). It is therefore possible that our  
390 results were also influenced by the presence of more sifaka-specific gene content than  
391 macaque-specific gene content.

392           While exome capture was successful in the sifakas, the degree of success  
393 depended on the capture baits used. Specifically, while the NimbleGen probes captured  
394 an average of more than 90% of pcoq1 CDS and only completely missed 6-7% of  
395 coding regions, the IDT probes captured less than 70% of pcoq1 CDS and completely

396 missed approximately one-third of coding regions. When we excluded missed regions,  
397 the difference in coverage reduced substantially, with both baits covering more than  
398 95% of CDS in regions with any coverage. Taken together, the difference between baits  
399 is primarily driven by IDT baits completely missing entire coding regions, rather than the  
400 failure of IDT baits to capture entire targets. Commercially available human exome  
401 capture kits differ markedly in design, with different targets, bait lengths, and bait  
402 overlap (Clark et al., 2011). Even in human samples, for which the baits are designed,  
403 these differences in bait design affect capture efficiency and the number and location of  
404 variants detected (Clark et al., 2011; Sulonen et al., 2011).

405         Compared to other reduced representation methods (e.g., RAD-seq), exome  
406 capture's primary strength is that it aims to capture all protein coding regions of the  
407 genome—the regions frequently of most interest from a functional standpoint. To this  
408 end, exome capture and sequencing, particularly with the NimbleGen probes, was  
409 highly successful in our samples, capturing the vast majority of CDS and leading to the  
410 identification of a rich suite of variants. However, exome capture's utility is not limited to  
411 these regions, and it can generate high-quality data in regulatory and untranslated  
412 regions (UTRs), as well as other intronic and intergenic regions (Samuels et al., 2013).  
413 In our data, we identified tens of millions of base pairs of sequence outside of coding  
414 regions (Figure 2); in fact, more variants were identified in introns than any other  
415 sequence class. Thus, exome capture across nonhuman primates holds great promise  
416 for not only recovering coding regions across the genome, but also recovering putatively  
417 neutral sequences (introns, intergenic regions, and four-fold degenerate sites) that can

418 be applied to traditional questions in molecular ecology regarding kinship, geneflow and  
419 demographic history.

420

421

### Acknowledgments

422 We thank Sibien Mahereza, Enafa Jaonarisoa, Elahavelo Efitroarane, Efitiria, Edouard  
423 Ramahatratra, Alison Richard, Roshna Wunderlich, Jeannin Ranaivonasy, and Joel  
424 Ratsirarson for helping with sample collection at Bezà Mahafaly; Roger Wiseman  
425 (Wisconsin National Primate Research Center) for providing macaque samples; and  
426 Gary Aronsen for lab assistance. We are grateful to the Nacey Maggioncalda  
427 Foundation (THW); National Science Foundation (NSF BCS-1455818; THW); the Yale  
428 Institute for Biospheric Studies (THW), Yale University (BJB); The George Washington  
429 University (EEG, BJB); the Yale MacMillan Center (EEG), and the Wenner-Gren  
430 Foundation (EEG) for generous financial support. Many analyses were conducted on  
431 the Louise and Ruddle High Performance Computing Clusters at Yale University  
432 (supported by NIH grants RR19895 and RR029676-01) and the Arizona State  
433 University High Performance Computing Cluster.

434

435

### References

436 Andrews, K. R., Good, J. M., Miller, M. R., Luikart, G., & Hohenlohe, P. A. (2016).  
437 Harnessing the power of RADseq for ecological and evolutionary genomics.  
438 *Nature Reviews Genetics*, 17(2), 81–92. <https://doi.org/10.1038/nrg.2015.28>  
439 Andrews, S. (2018). *FastQC: A Quality Control tool for High Throughput Sequence*  
440 *Data*. Retrieved from <https://www.bioinformatics.babraham.ac.uk/projects/fastqc/>

- 441 Arnold, B., Corbett-Detig, R. B., Hartl, D., & Bomblies, K. (2013). RADseq  
442 underestimates diversity and introduces genealogical biases due to nonrandom  
443 haplotype sampling. *Molecular Ecology*, 22(11), 3179–3190.  
444 <https://doi.org/10.1111/mec.12276>
- 445 Baird, N. A., Etter, P. D., Atwood, T. S., Currey, M. C., Shiver, A. L., Lewis, Z. A., ...  
446 Johnson, E. A. (2008). Rapid SNP Discovery and Genetic Mapping Using  
447 Sequenced RAD Markers. *PLoS ONE*, 3(10), e3376.  
448 <https://doi.org/10.1371/journal.pone.0003376>
- 449 Bamshad, M. J., Ng, S. B., Bigham, A. W., Tabor, H. K., Emond, M. J., Nickerson, D. A.,  
450 & Shendure, J. (2011). Exome sequencing as a tool for Mendelian disease gene  
451 discovery. *Nature Reviews Genetics*, 12(11), 745–755.  
452 <https://doi.org/10.1038/nrg3031>
- 453 Bataillon, T., Duan, J., Hvilsom, C., Jin, X., Li, Y., Skov, L., ... Schierup, M. H. (2015).  
454 Inference of Purifying and Positive Selection in Three Subspecies of  
455 Chimpanzees (*Pan troglodytes*) from Exome Sequencing. *Genome Biology and  
456 Evolution*, 7(4), 1122–1132. <https://doi.org/10.1093/gbe/evv058>
- 457 Bergey, C. M., Phillips-Conroy, J. E., Disotell, T. R., & Jolly, C. J. (2016). Dopamine  
458 pathway is highly diverged in primate species that differ markedly in social  
459 behavior. *Proceedings of the National Academy of Sciences*, 113(22), 6178–  
460 6181. <https://doi.org/10.1073/pnas.1525530113>
- 461 Bilgüvar, K., Öztürk, A. K., Louvi, A., Kwan, K. Y., Choi, M., Tatlı, B., ... Günel, M.  
462 (2010). Whole-exome sequencing identifies recessive WDR62 mutations in

- 463 severe brain malformations. *Nature*, 467(7312), 207–210.
- 464 <https://doi.org/10.1038/nature09327>
- 465 Bushnell, B. (2018). *BBTools*. Retrieved from <https://sourceforge.net/projects/bbmap/>
- 466 Carbone, L., Harris, R. A., Gnerre, S., Veeramah, K. R., Lorente-Galdos, B.,
- 467 Huddleston, J., ... Gibbs, R. A. (2014). Gibbon genome and the fast karyotype
- 468 evolution of small apes. *Nature*, 513(7517), 195–201.
- 469 <https://doi.org/10.1038/nature13679>
- 470 Carlsson, H.-E., Schapiro, S. J., Farah, I., & Hau, J. (2004). Use of primates in
- 471 research: A global overview. *American Journal of Primatology*, 63(4), 225–237.
- 472 <https://doi.org/10.1002/ajp.20054>
- 473 Clark, M. J., Chen, R., Lam, H. Y. K., Karczewski, K. J., Chen, R., Euskirchen, G., ...
- 474 Snyder, M. (2011). Performance comparison of exome DNA sequencing
- 475 technologies. *Nature Biotechnology*, 29(10), 908–914.
- 476 <https://doi.org/10.1038/nbt.1975>
- 477 de Manuel, M., Kuhlwilm, M., Frandsen, P., Sousa, V. C., Desai, T., Prado-Martinez, J.,
- 478 ... Marques-Bonet, T. (2016). Chimpanzee genomic diversity reveals ancient
- 479 admixture with bonobos. *Science*, 354(6311), 477–481.
- 480 <https://doi.org/10.1126/science.aag2602>
- 481 dos Reis, M., Gunnell, G. F., Barba-Montoya, J., Wilkins, A., Yang, Z., & Yoder, A. D.
- 482 (2018). Using Phylogenomic Data to Explore the Effects of Relaxed Clocks and
- 483 Calibration Strategies on Divergence Time Estimation: Primates as a Test Case.
- 484 *Systematic Biology*, 67(4), 594–615. <https://doi.org/10.1093/sysbio/syy001>

- 485 Ellegren, H. (2014). Genome sequencing and population genomics in non-model  
486 organisms. *Trends in Ecology & Evolution*, 29(1), 51–63.  
487 <https://doi.org/10.1016/j.tree.2013.09.008>
- 488 Ewels, P., Magnusson, M., Lundin, S., & Källér, M. (2016). MultiQC: summarize  
489 analysis results for multiple tools and samples in a single report. *Bioinformatics*,  
490 32(19), 3047–3048. <https://doi.org/10.1093/bioinformatics/btw354>
- 491 Faust, G. G., & Hall, I. M. (2014). SAMBLASTER: fast duplicate marking and structural  
492 variant read extraction. *Bioinformatics*, 30(17), 2503–2505.  
493 <https://doi.org/10.1093/bioinformatics/btu314>
- 494 Garrison, E., & Marth, G. (2012). Haplotype-based variant detection from short-read  
495 sequencing. *ArXiv:1207.3907 [q-Bio.GN]*. Retrieved from  
496 <http://arxiv.org/abs/1207.3907>
- 497 George, R. D., McVicker, G., Diederich, R., Ng, S. B., MacKenzie, A. P., Swanson, W.  
498 J., ... Thomas, J. H. (2011). Trans genomic capture and sequencing of primate  
499 exomes reveals new targets of positive selection. *Genome Research*, 21(10),  
500 1686–1694. <https://doi.org/10.1101/gr.121327.111>
- 501 Gibbs, R. A., Rogers, J., Katze, M. G., Bumgarner, R., Weinstock, G. M., Mardis, E. R.,  
502 ... Zwiig, A. S. (2007). Evolutionary and Biomedical Insights from the Rhesus  
503 Macaque Genome. *Science*, 316(5822), 222–234.  
504 <https://doi.org/10.1126/science.1139247>
- 505 Gnirke, A., Melnikov, A., Maguire, J., Rogov, P., LeProust, E. M., Brockman, W., ...  
506 Nusbaum, C. (2009). Solution hybrid selection with ultra-long oligonucleotides for

- 507           massively parallel targeted sequencing. *Nature Biotechnology*, 27(2), 182–189.  
508           <https://doi.org/10.1038/nbt.1523>
- 509   Goodwin, S., McPherson, J. D., & McCombie, W. R. (2016). Coming of age: ten years  
510           of next-generation sequencing technologies. *Nature Reviews Genetics*, 17(6),  
511           333–351. <https://doi.org/10.1038/nrg.2016.49>
- 512   Grüning, B., Dale, R., Sjödin, A., Chapman, B. A., Rowe, J., Tomkins-Tinch, C. H., ...  
513           Köster, J. (2018). Bioconda: sustainable and comprehensive software distribution  
514           for the life sciences. *Nature Methods*, 15(7), 475–476.  
515           <https://doi.org/10.1038/s41592-018-0046-7>
- 516   Herrera, J. P., & Dávalos, L. M. (2016). Phylogeny and Divergence Times of Lemurs  
517           Inferred with Recent and Ancient Fossils in the Tree. *Systematic Biology*, 65(5),  
518           772–791. <https://doi.org/10.1093/sysbio/syw035>
- 519   Hvilsom, C., Qian, Y., Bataillon, T., Li, Y., Mailund, T., Sallé, B., ... Schierup, M. H.  
520           (2012). Extensive X-linked adaptive evolution in central chimpanzees.  
521           *Proceedings of the National Academy of Sciences*, 109(6), 2054–2059.  
522           <https://doi.org/10.1073/pnas.1106877109>
- 523   Jin, X., He, M., Ferguson, B., Meng, Y., Ouyang, L., Ren, J., ... Wang, X. (2012). An  
524           Effort to Use Human-Based Exome Capture Methods to Analyze Chimpanzee  
525           and Macaque Exomes. *PLoS ONE*, 7(7), e40637.  
526           <https://doi.org/10.1371/journal.pone.0040637>
- 527   Jolly, C. J. (2001). A proper study for mankind: Analogies from the Papionin monkeys  
528           and their implications for human evolution. *American Journal of Physical*  
529           *Anthropology*, 116(S33), 177–204. <https://doi.org/10.1002/ajpa.10021>



- 530 Jones, M. R., & Good, J. M. (2016). Targeted capture in evolutionary and ecological  
531 genomics. *Molecular Ecology*, 25(1), 185–202.  
532 <https://doi.org/10.1111/mec.13304>
- 533 Kortschak, R. D., Pedersen, B. S., & Adelson, D. L. (2017). biogo/hts: high throughput  
534 sequence handling for the Go language. *The Journal of Open Source Software*,  
535 2(10), 168. <https://doi.org/10.21105/joss.00168>
- 536 Köster, J., & Rahmann, S. (2012). Snakemake--a scalable bioinformatics workflow  
537 engine. *Bioinformatics*, 28(19), 2520–2522.  
538 <https://doi.org/10.1093/bioinformatics/bts480>
- 539 Lander, E. S., & Waterman, M. S. (1988). Genomic mapping by fingerprinting random  
540 clones: A mathematical analysis. *Genomics*, 2(3), 231–239.  
541 [https://doi.org/10.1016/0888-7543\(88\)90007-9](https://doi.org/10.1016/0888-7543(88)90007-9)
- 542 Lawler, R. R., Richard, A. F., & Riley, M. A. (2001). Characterization and screening of  
543 microsatellite loci in a wild lemur population (*Propithecus verreauxi verreauxi*).  
544 *American Journal of Primatology*, 55(4), 253–259.  
545 <https://doi.org/10.1002/ajp.1058>
- 546 Lea, A. J., Altmann, J., Alberts, S. C., & Tung, J. (2016). Resource base influences  
547 genome-wide DNA methylation levels in wild baboons (*Papio cynocephalus*).  
548 *Molecular Ecology*, 25(8), 1681–1696. <https://doi.org/10.1111/mec.13436>
- 549 Li, H. (2011). A statistical framework for SNP calling, mutation discovery, association  
550 mapping and population genetical parameter estimation from sequencing data.  
551 *Bioinformatics*, 27(21), 2987–2993. <https://doi.org/10.1093/bioinformatics/btr509>

- 552 Li, H. (2013). Aligning sequence reads, clone sequences and assembly contigs with  
553 BWA-MEM. *ArXiv*, 1303.3997.
- 554 Li, H., Handsaker, B., Wysoker, A., Fennell, T., Ruan, J., Homer, N., ... 1000 Genome  
555 Project Data Processing Subgroup. (2009). The Sequence Alignment/Map format  
556 and SAMtools. *Bioinformatics*, 25(16), 2078–2079.  
557 <https://doi.org/10.1093/bioinformatics/btp352>
- 558 Locke, D. P., Hillier, L. W., Warren, W. C., Worley, K. C., Nazareth, L. V., Muzny, D. M.,  
559 ... Wilson, R. K. (2011). Comparative and demographic analysis of orang-utan  
560 genomes. *Nature*, 469(7331), 529–533. <https://doi.org/10.1038/nature09687>
- 561 Lowry, D. B., Hoban, S., Kelley, J. L., Lotterhos, K. E., Reed, L. K., Antolin, M. F., &  
562 Storer, A. (2017). Breaking RAD: an evaluation of the utility of restriction site-  
563 associated DNA sequencing for genome scans of adaptation. *Molecular Ecology*  
564 *Resources*, 17(2), 142–152. <https://doi.org/10.1111/1755-0998.12635>
- 565 McKenna, A., Hanna, M., Banks, E., Sivachenko, A., Cibulskis, K., Kernytsky, A., ...  
566 DePristo, M. A. (2010). The Genome Analysis Toolkit: A MapReduce framework  
567 for analyzing next-generation DNA sequencing data. *Genome Research*, 20(9),  
568 1297–1303. <https://doi.org/10.1101/gr.107524.110>
- 569 McLaren, W., Gil, L., Hunt, S. E., Riat, H. S., Ritchie, G. R. S., Thormann, A., ...  
570 Cunningham, F. (2016). The Ensembl Variant Effect Predictor. *Genome Biology*,  
571 17(1). <https://doi.org/10.1186/s13059-016-0974-4>
- 572 Neph, S., Kuehn, M. S., Reynolds, A. P., Haugen, E., Thurman, R. E., Johnson, A. K.,  
573 ... Stamatoyannopoulos, J. A. (2012). BEDOPS: high-performance genomic

574 feature operations. *Bioinformatics*, 28(14), 1919–1920.  
575 <https://doi.org/10.1093/bioinformatics/bts277>

576 Ng, S. B., Buckingham, K. J., Lee, C., Bigham, A. W., Tabor, H. K., Dent, K. M., ...  
577 Bamshad, M. J. (2010). Exome sequencing identifies the cause of a mendelian  
578 disorder. *Nature Genetics*, 42(1), 30–35. <https://doi.org/10.1038/ng.499>

579 Pedersen, B. S., & Quinlan, A. R. (2017). cyvcf2: fast, flexible variant analysis with  
580 Python. *Bioinformatics*, 33(12), 1867–1869.  
581 <https://doi.org/10.1093/bioinformatics/btx057>

582 Perry, G. H., Yang, F., Marques-Bonet, T., Murphy, C., Fitzgerald, T., Lee, A. S., ...  
583 Redon, R. (2008). Copy number variation and evolution in humans and  
584 chimpanzees. *Genome Research*, 18(11), 1698–1710.  
585 <https://doi.org/10.1101/gr.082016.108>

586 Poplin, R., Ruano-Rubio, V., DePristo, M. A., Fennell, T. J., Carneiro, M. O., Van der  
587 Auwera, G. A., ... Banks, E. (2018). Scaling accurate genetic variant discovery to  
588 tens of thousands of samples. *BioRxiv*, 201178. <https://doi.org/10.1101/201178>

589 Prado-Martinez, J., Sudmant, P. H., Kidd, J. M., Li, H., Kelley, J. L., Lorente-Galdos, B.,  
590 ... Marques-Bonet, T. (2013). Great ape genetic diversity and population history.  
591 *Nature*, 499(7459), 471–475. <https://doi.org/10.1038/nature12228>

592 Quinlan, A. R., & Hall, I. M. (2010). BEDTools: a flexible suite of utilities for comparing  
593 genomic features. *Bioinformatics*, 26(6), 841–842.  
594 <https://doi.org/10.1093/bioinformatics/btq033>

595 Richard, A. F., Dewar, R. E., Schwartz, M., & Ratsirarson, J. (2002). Life in the slow  
596 lane? Demography and life histories of male and female sifaka (*Propithecus*

- 597           *verreauxi verreauxi*): Demography and life histories of male and female sifaka.  
598           *Journal of Zoology*, 256(4), 421–436.  
599           <https://doi.org/10.1017/S0952836902000468>
- 600 Rogers, J., & Gibbs, R. A. (2014). Comparative primate genomics: emerging patterns of  
601 genome content and dynamics. *Nature Reviews Genetics*, 15(5), 347–359.  
602           <https://doi.org/10.1038/nrg3707>
- 603 Rubin, B. E. R., Ree, R. H., & Moreau, C. S. (2012). Inferring Phylogenies from RAD  
604 Sequence Data. *PLoS ONE*, 7(4), e33394.  
605           <https://doi.org/10.1371/journal.pone.0033394>
- 606 Samuels, D. C., Han, L., Li, J., Quanghu, S., Clark, T. A., Shyr, Y., & Guo, Y. (2013).  
607 Finding the lost treasures in exome sequencing data. *Trends in Genetics*, 29(10),  
608 593–599. <https://doi.org/10.1016/j.tig.2013.07.006>
- 609 Sims, D., Sudbery, I., Ilott, N. E., Heger, A., & Ponting, C. P. (2014). Sequencing depth  
610 and coverage: key considerations in genomic analyses. *Nature Reviews*  
611 *Genetics*, 15(2), 121–132. <https://doi.org/10.1038/nrg3642>
- 612 Snyder-Mackler, N., Majoros, W. H., Yuan, M. L., Shaver, A. O., Gordon, J. B., Kopp, G.  
613 H., ... Tung, J. (2016). Efficient Genome-Wide Sequencing and Low-Coverage  
614 Pedigree Analysis from Noninvasively Collected Samples. *Genetics*, 203(2),  
615 699–714. <https://doi.org/10.1534/genetics.116.187492>
- 616 Springer, M. S., Meredith, R. W., Gatesy, J., Emerling, C. A., Park, J., Rabosky, D. L.,  
617 ... Murphy, W. J. (2012). Macroevolutionary Dynamics and Historical  
618 Biogeography of Primate Diversification Inferred from a Species Supermatrix.  
619 *PLoS ONE*, 7(11), e49521. <https://doi.org/10.1371/journal.pone.0049521>

- 620 Sulonen, A.-M., Ellonen, P., Almusa, H., Lepistö, M., Eldfors, S., Hannula, S., ...  
621 Saarela, J. (2011). Comparison of solution-based exome capture methods for  
622 next generation sequencing. *Genome Biology*, 12(9), R94.  
623 <https://doi.org/10.1186/gb-2011-12-9-r94>
- 624 Swedell, L., & Plummer, T. (2012). A Papionin Multilevel Society as a Model for Hominin  
625 Social Evolution. *International Journal of Primatology*, 33(5), 1165–1193.  
626 <https://doi.org/10.1007/s10764-012-9600-9>
- 627 Teixeira, J. C., de Filippo, C., Weihmann, A., Meneu, J. R., Racimo, F., Dannemann,  
628 M., ... Andrés, A. M. (2015). Long-Term Balancing Selection in LAD1 Maintains a  
629 Missense Trans-Species Polymorphism in Humans, Chimpanzees, and  
630 Bonobos. *Molecular Biology and Evolution*, 32(5), 1186–1196.  
631 <https://doi.org/10.1093/molbev/msv007>
- 632 Vallender, E. J. (2011). Expanding whole exome resequencing into non-human  
633 primates. *Genome Biology*, 12(9), R87. <https://doi.org/10.1186/gb-2011-12-9-r87>
- 634 Varki, A. (2000). A Chimpanzee Genome Project Is a Biomedical Imperative. *Genome*  
635 *Research*, 10(8), 1065–1070. <https://doi.org/10.1101/gr.10.8.1065>
- 636 Wall, J. D., Schlebusch, S. A., Alberts, S. C., Cox, L. A., Snyder-Mackler, N., Nevenon,  
637 K. A., ... Tung, J. (2016). Genomewide ancestry and divergence patterns from  
638 low-coverage sequencing data reveal a complex history of admixture in wild  
639 baboons. *Molecular Ecology*, 25(14), 3469–3483.  
640 <https://doi.org/10.1111/mec.13684>

- 641 Wendl, M. C., & Barbazuk, W. B. (2005). Extension of Lander-Waterman theory for  
642 sequencing filtered DNA libraries. *BMC Bioinformatics*, 6, 245.  
643 <https://doi.org/10.1186/1471-2105-6-245>
- 644 Wrangham, R. W. (1987). The significance of African apes for reconstructing human  
645 social evolution. In W. G. Kinzey (Ed.), *The evolution of human behavior: primate*  
646 *models* (pp. 51–71). Albany, NY: SUNY Press.
- 647  
648  
649

650

## Figures

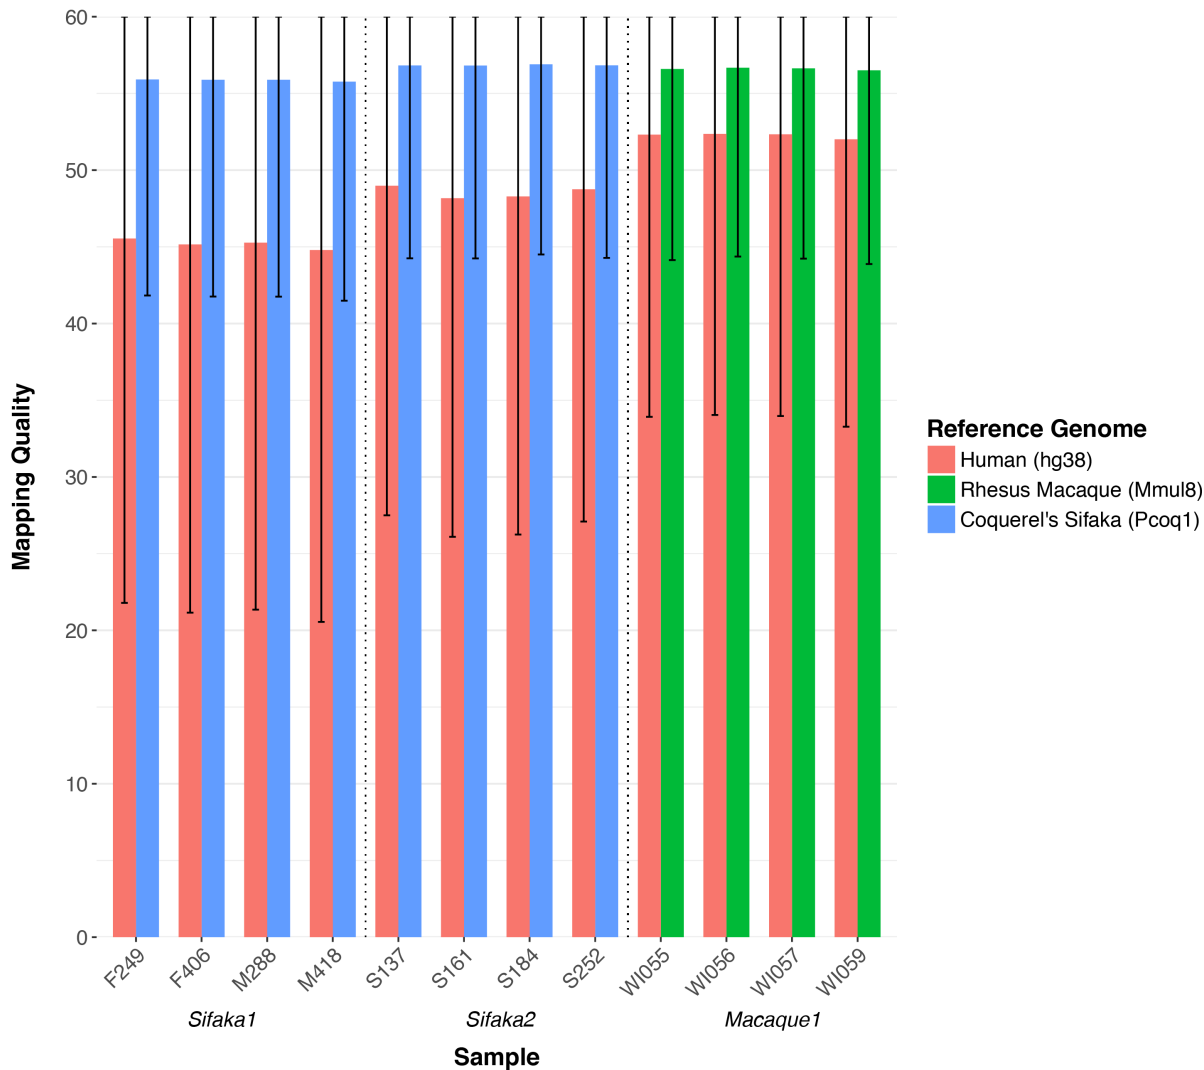

651

652 Figure 1. Mean mapping quality (MAPQ) for samples mapped to their most closely  
653 related reference genome (pcoq1 for sifakas and mmul8 for macaques) and the human  
654 reference genome (hg38). Samples are organized by dataset membership, defined by  
655 species and capture kit. Sifaka1 and Macaque1 were processed using NimbleGen baits  
656 and Sifaka2 was processed using IDT baits. Error bars denote plus/minus one standard  
657 deviation. Note that maximum mapping quality is 60.

658

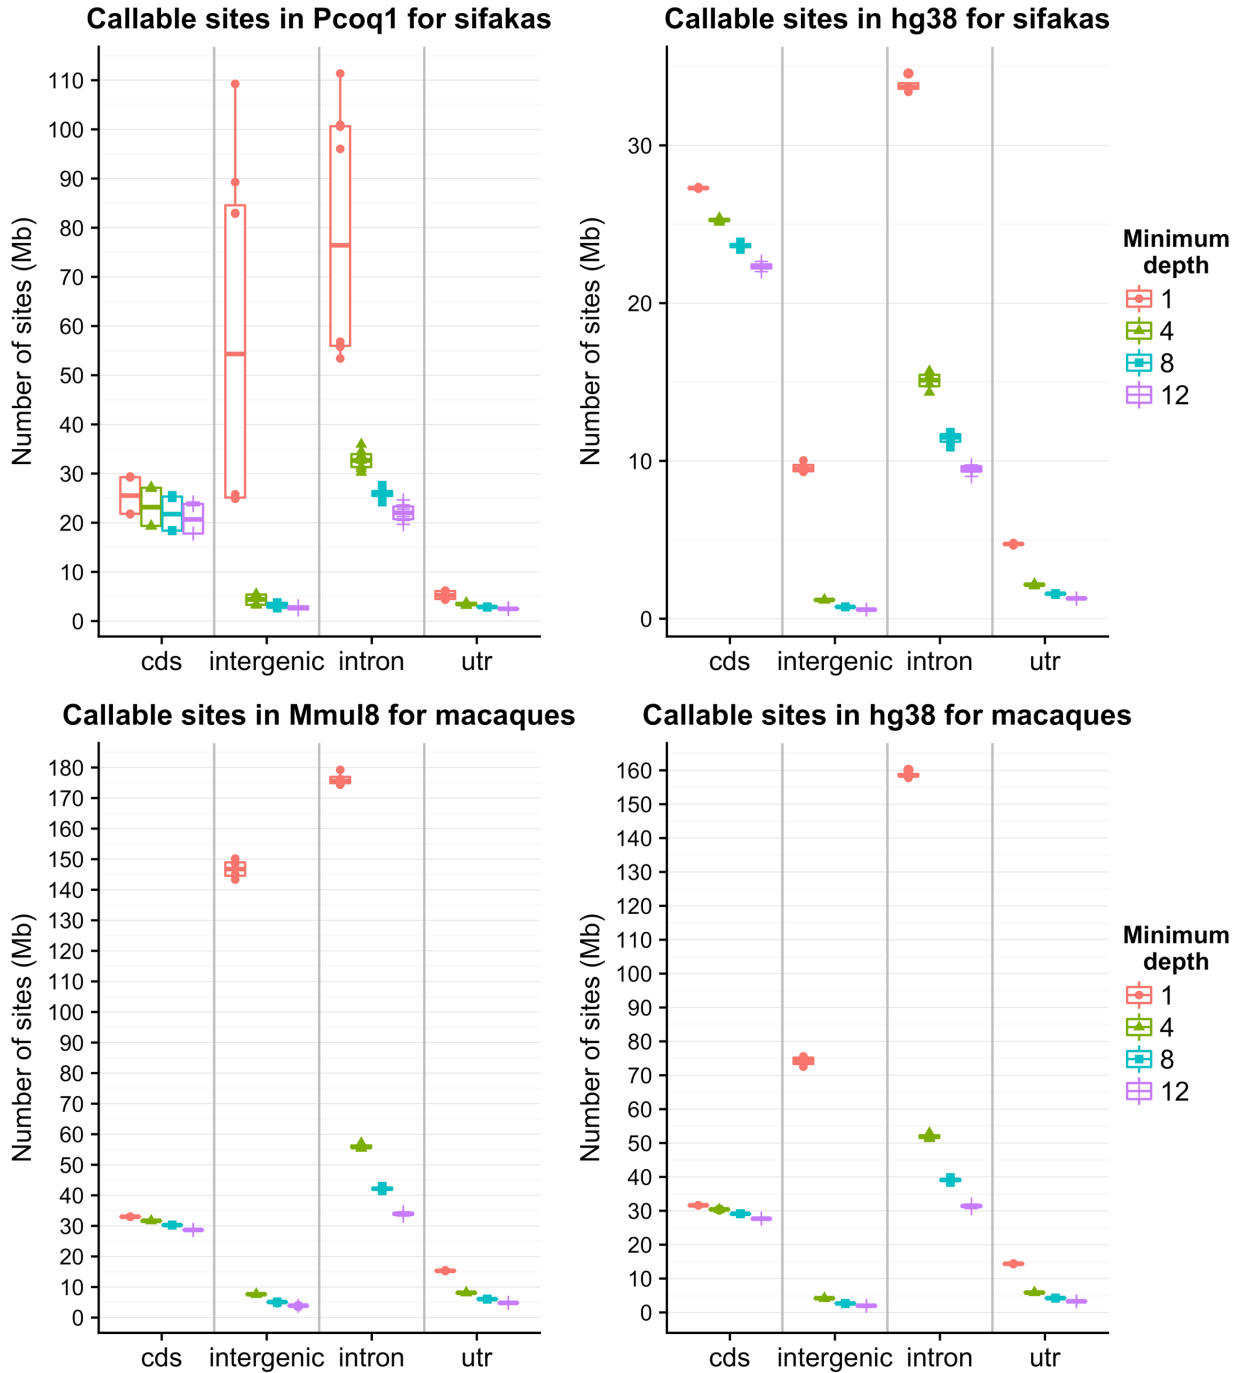

659

660 Figure 2. The effect of minimum depth on the number of callable sites across genomic  
661 regions. Samples are mapped to their most closely related reference genome (pcoq1 for  
662 sifakas and mmul8 for macaques) and the human reference genome (hg38). Minimum



663 depth thresholds were 1, 4, 8, and 12 nonduplicate reads per site with MAPQ greater  
664 than or equal to 20.

665

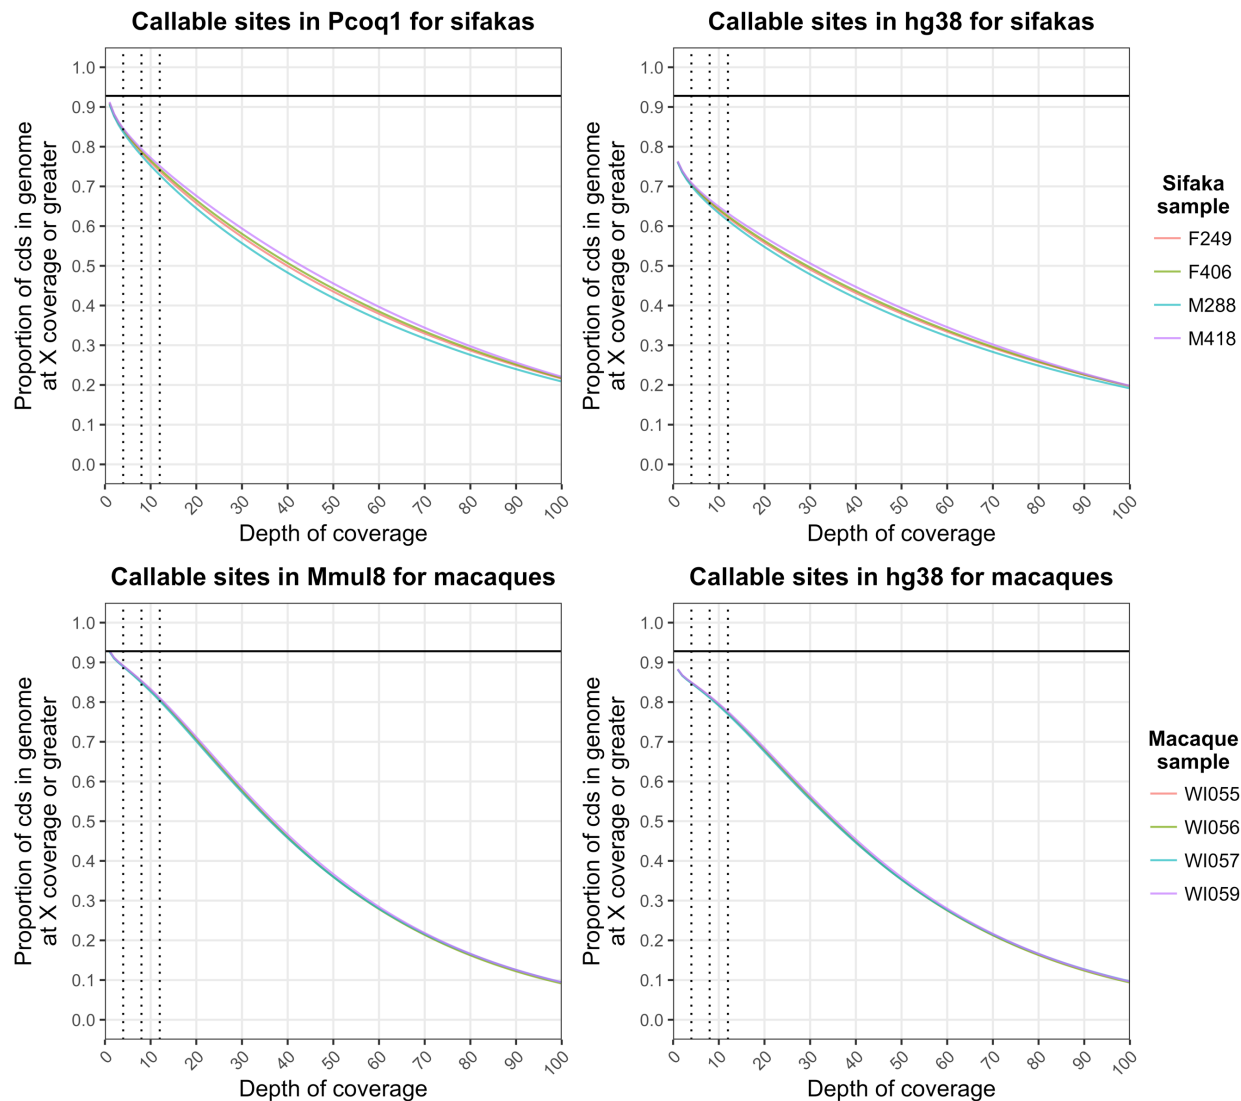

666

667 Figure 3. Depth of coverage across the coding regions of the genome. Samples are  
668 mapped to their most closely related reference posted genome (pcoq1 for sifakas and mmul8  
669 for macaques) and the human reference genome (hg38). The x-axis presents depth of  
670 coverage, measured as the number of nonduplicate reads with MAPQ  $\geq$  20. The y-axis  
671 presents the proportion of coding sequence in the genome with X or greater coverage,  
672 where X is the value on the x-axis. The vertical dotted lines highlight three common filter  
673 values: 4x or greater coverage, 8x or greater coverage, and 12x or greater coverage.

674 The solid horizontal line marks the fraction of the genome covered by one or more  
675 reads for macaque samples mapped to mmul8.

676

677

### Callable sites in Pcoq1 for sifakas

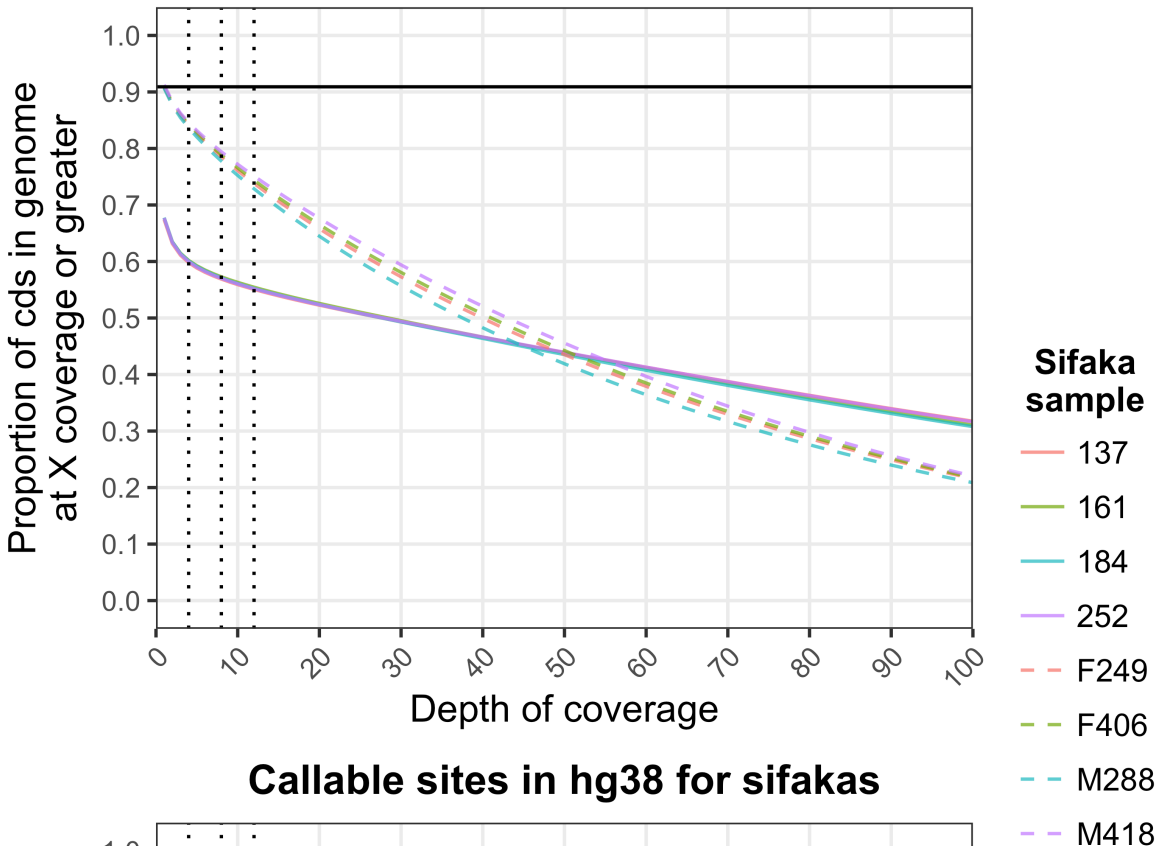

### Callable sites in hg38 for sifakas

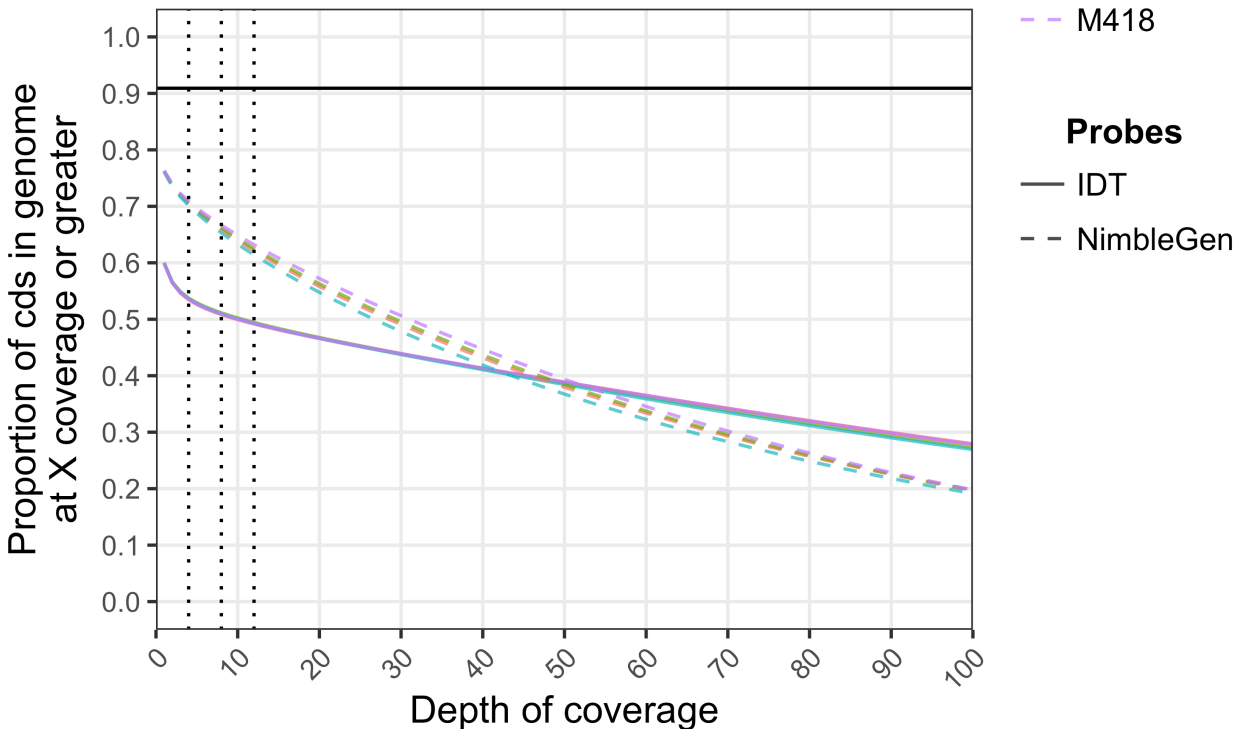

679 Figure 4. A comparison of depth of coverage across the coding regions of the genome  
680 for NimbleGen and IDT baits. Samples are mapped to pcoq1 and hg38. Samples  
681 captured with NimbleGen baits are represented by dashed lines, while those captured  
682 with IDT baits are represented by solid lines. The x-axis presents depth of coverage,  
683 measured as the number of nonduplicate reads with MAPQ  $\geq 20$ . The y-axis presents  
684 the proportion of coding sequence in the genome with X or greater coverage, where X is  
685 the value on the x-axis. The vertical dotted lines highlight three common filter values: 4x  
686 or greater coverage, 8x or greater coverage, and 12x or greater coverage. The solid  
687 horizontal line marks the fraction of the genome covered by one or more reads for  
688 NimbleGen samples mapped to pcoq1.  
689

690

## Tables

691 **Table 1. Coding variants identified.<sup>a</sup>**

| <b>Coding variant type</b> | <b>Sifaka1<br/>(<i>Pcoq1</i>)</b> | <b>Sifaka1<br/>(<i>hg38</i>)</b> | <b>Macaque1<br/>(<i>Mmul8</i>)</b> | <b>Macaque1<br/>(<i>hg38</i>)</b> |
|----------------------------|-----------------------------------|----------------------------------|------------------------------------|-----------------------------------|
| Synonymous                 | 62,201                            | 114,951                          | 96,650                             | 95,982                            |
| Nonsynonymous              | 29,079                            | 102,711                          | 51,743                             | 75,499                            |
| Frameshift variant         | 1,230                             | 9,648                            | 1,044                              | 13,171                            |
| Stop                       | 409                               | 3,563                            | 408                                | 3,231                             |

692 <sup>a</sup>Values are counts of variants identified for each dataset-reference genome

693 combination.

694
